# Supplementary material for: ABHD5 stimulates PNPLA1-mediated ω-O-acylceramide biosynthesis essential for a functional skin permeability barrier
Source: PubMed Central journal article supplement (PMC6277169; doi:10.1194/jlr.m089771), 2018-10-25
Supplement: 10.1194_M089771_jlr.M089771-1.pdf [file 10.1194_M089771_jlr.M089771-1.pdf]

## **SUPPLEMENTAL DATA:**

### **ABHD5 Stimulates PNPLA1-mediated Omega-O-Acylceramide Biosynthesis Essential for a Functional Skin Permeability Barrier**

Benedikt Kien<sup>1</sup>, Susanne Grond<sup>1</sup>, Guenter Haemmerle<sup>1</sup>, Achim Lass<sup>1,2</sup>, Thomas O. Eichmann<sup>1,3</sup>, and Franz P. W. Radner<sup>1,\*</sup>

<sup>1</sup> Institute of Molecular Biosciences, University of Graz, Graz, Austria.

<sup>2</sup> BioTechMed-Graz, Austria

<sup>3</sup> Center for Explorative Lipidomics, BioTechMed-Graz, Graz, Austria.

\* To whom correspondence should be addressed: Franz P. W. Radner, Institute of Molecular Biosciences, Heinrichstraße 31/II, University of Graz, 8010 Graz, Austria. Phone: +43-316-3801921, Email: [franz.radner@uni-graz.at](mailto:franz.radner@uni-graz.at)

**Supplemental Table S1. Primer pairs used for PCR amplification of respective genes.** Primers were designed to create endonuclease cleavage sites (underlined) for subsequent cloning strategies.

| <b>Primer name</b>     | <b>Sequence</b>                                     |
|------------------------|-----------------------------------------------------|
| <i>PNPLA1</i> -His_fw  | 5'- <u>TTCTCGAGGA</u> AAGAACAGGTGTTCAAGGG-3'        |
| <i>PNPLA1</i> -His_rv  | 5'- <u>TTTCTAGAATCACTGC</u> ACTTTGCTGCTTG-3'        |
| <i>Pnpla1</i> -Flag_fw | 5'- <u>GGGAATTCACCA</u> TGGACGAACAGGTGTTCAAAG-3'    |
| <i>Pnpla1</i> -Flag_rv | 5'- <u>TTTCTAGAGGAGT</u> TCTGGCCACTCACTCC-3'        |
| <i>Pnpla1</i> -YFP_fw  | 5'- <u>TTCTCGAGCTGAC</u> GAACAGGTGTTCAAAGGAG-3'     |
| <i>Pnpla1</i> -YFP_rv  | 5'- <u>TTGAATTC</u> TTAGGAGTTCTGGCCACTCAC           |
| <i>Atgl</i> -Flag_fw   | 5'- <u>TTAGATCTACCA</u> TGTTCCCGAGGGAGACC-3'        |
| <i>Atgl</i> -Flag_rv   | 5'- <u>TTGGTACCTCG</u> CAAGGCCGGGAGGCC-3'           |
| <i>Abhd5</i> -CFP_fw   | 5'- <u>TTCTCGAGCTAA</u> AGCGATGGCGGCGGAG            |
| <i>Abhd5</i> -CFP_rv   | 5'- <u>TTGGATCCTCAG</u> TCTACTGTGTGGCAGATCTC        |
| <i>ELOVL4</i> _fw      | 5'- <u>GGAACGCGTGGG</u> CTCCTGGACTCGG-3'            |
| <i>ELOVL4</i> _rv      | 5'- <u>GGTCTAGATAA</u> TCTCCTTTTGCTTTTCCATTTTTTC-3' |
| <i>CYP4F22</i> _fw     | 5'- <u>GGACTCGAGCTG</u> CCCATCACAGACCG-3'           |
| <i>CYP4F22</i> _rv     | 5'- <u>GAAGCGGCCGCAC</u> CGGTGGCCCGCGGAGG-3'        |
| <i>CERS3</i> _fw       | 5'- <u>GCGGGATCCTTT</u> TGGACGTTTAAAGAATGGTTCTG-3'  |
| <i>CERS3</i> _rv       | 5'- <u>GGA</u> ACTAGTATGGCCATGCTGGCCAT-3'           |

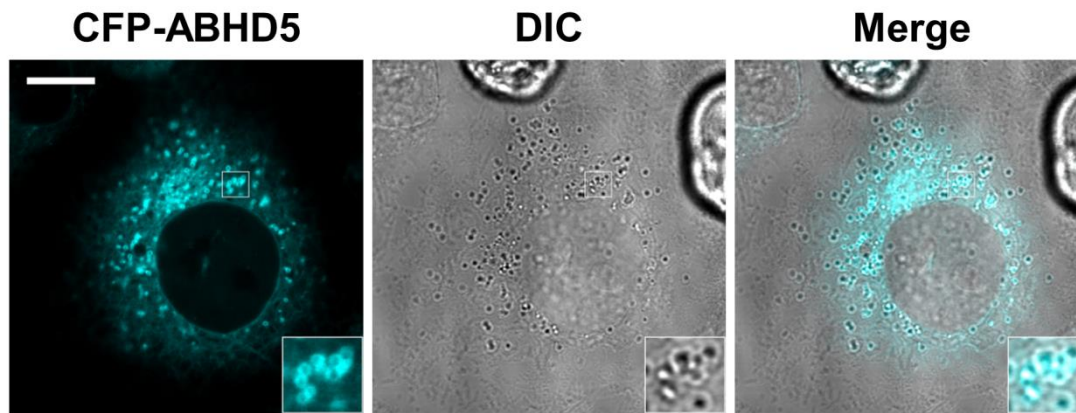

**Supplemental Figure S1. ABHD5 localizes to lipid droplets in COS-7 cells.** COS-7 cells were transfected with an expression vector encoding murine *Abhd5* fused to an N-terminal CFP-tag. To promote lipid droplet formation, cells were cultivated in medium supplemented with BSA-conjugated oleic acid. Intracellular localization of CFP-ABHD5 was analyzed by confocal fluorescence microscopy. Representative images are depicted. *Scale bar*, 10  $\mu\text{m}$ . *Insets*, 3 $\times$  zoom. Abbreviations: CFP, cyan fluorescent protein; DIC, differential interference contrast.

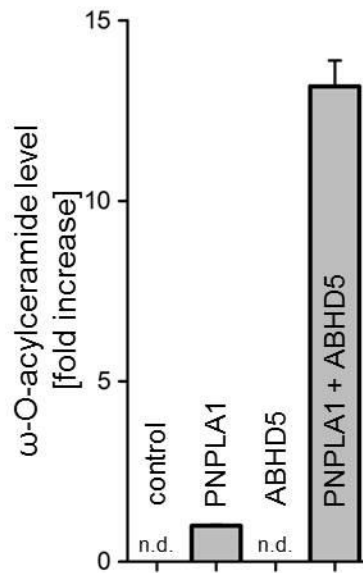

**Supplemental Figure S2. ABHD5 stimulates PNPLA1-dependent AcylCer biosynthesis.**

Autoradiography signals of [1-<sup>14</sup>C]-labeled AcylCer were obtained by exposure of developed TLC plates to a light-sensitive film. Band intensities were analyzed by densitometry using ImageJ software and normalized to cells expressing PNPLA1.

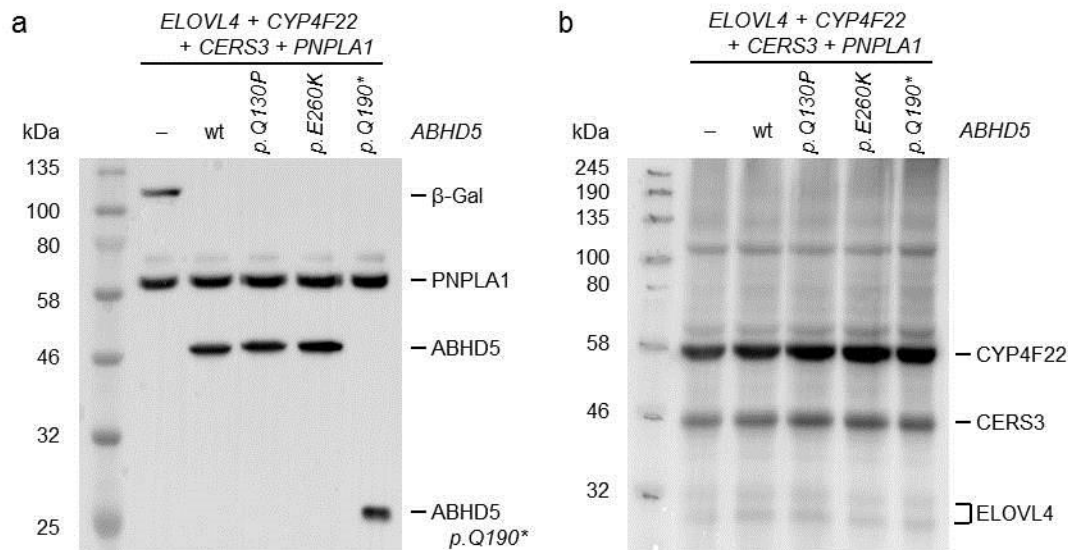

**Supplemental Figure S3. Immunodetection proved similar expression levels of wild-type and mutant ABHD5 proteins in ULC  $\omega$ -hydroxy ceramide-producing HEK 293T cells.** HEK 293T cells were transfected with respective mammalian expression plasmids encoding human proteins. After twenty-four hours, **(a)** expression of PNPLA1 as well as mutant and wild-type ABHD5 proteins was detected using anti-Xpress® antibody, followed by **(b)** detection of ELOVL4, CYP4F22, and CERS3 expression with anti-Flag M2-HRP antibody.
